# Supplementary material for: A nap to recap or how reward regulates hippocampal-prefrontal memory networks during daytime sleep in humans
Source: eLife journal article supplement (doi:10.7554/elife.07903), 2015-10-16
Supplement: supp [file elife_poa_e07903_Supplementary_File_1.pdf › elife_poa_e07903_Supplementary_File_1.pdf]

**Supplementary file 1: Supplementary table 1**  
Characteristics of the nap period for participants in the Sleep group

| Sleep stages                  | Group (Mean ± SEM) |
|-------------------------------|--------------------|
| W (min)                       | 21.67 ± 2.92       |
| N1 (min)                      | 9.05 ± 1.62        |
| N2 (min)                      | 17.67 ± 2.24       |
| N3 (min)                      | 31.55 ± 3.70       |
| REM (min)                     | 5.05 ± 1.99        |
| N2 Latency (min)              | 14.29 ± 2.04       |
| Total sleep time (min)        | 54.26 ± 4.39       |
|                               |                    |
| Total number of spindles      | 210.93 ± 22.08     |
| Total number of slow spindles | 104.00 ± 15.09     |
| Total number of fast spindles | 106.93 ± 14.31     |
