# Supplementary material for: A nap to recap or how reward regulates hippocampal-prefrontal memory networks during daytime sleep in humans
Source: eLife journal article supplement (doi:10.7554/elife.07903), 2015-10-16
Supplement: supp [file elife_poa_e07903_Supplementary_File_2.pdf › elife_poa_e07903_Supplementary_File_2.pdf]

# Supplementary file 2: Supplementary table 2

## Whole brain activations for all reported results

| Brain Region                                                              | Lat.  | cluster size | unc. p-value | SVC p-value | peak T | peak Z | X   | Y   | Z   |
|---------------------------------------------------------------------------|-------|--------------|--------------|-------------|--------|--------|-----|-----|-----|
| <b>Test : Sleep &gt; Wake for HR &gt; LR</b>                              |       |              |              |             |        |        |     |     |     |
| Hippocampus                                                               | Right | 33           | <0.001       | 0.006       | 4.76   | 4.04   | 30  | -10 | -23 |
| Parahippocampal gyrus                                                     | Right | 12           | <0.001       | 0.02        | 4.18   | 3.65   | 21  | -40 | -5  |
| subthreshold Hippocampus                                                  | Left  | 1            | 0.0073       |             | 2.60   | 2.44   | -18 | -40 | 1   |
| <b>Test : HR: Inf.2 &gt; Inf.1 modulated by slow spindles</b>             |       |              |              |             |        |        |     |     |     |
| Hippocampus                                                               | Right | 10           | <0.001       | 0.022       | 5.43   | 3.79   | 30  | -13 | -11 |
| Middle Orbital Gyrus                                                      | Left  | 4            | <0.001       |             | 5.62   | 3.86   | -24 | 41  | -11 |
| subthreshold Hippocampus                                                  | Left  | 1            | 0.0159       |             | 2.425  | 2.147  | -24 | -31 | -8  |
| <b>Retest : Inf. 2: Sleep&gt;Wake for HR vs. LR</b>                       |       |              |              |             |        |        |     |     |     |
| Hippocampus                                                               | Left  | 11           | 7.92E-05     | 0.013       | 4.51   | 3.78   | -36 | -28 | -8  |
| subthreshold Hippocampus                                                  | Right | 2            | 0.0019       |             | 2.183  | 2.063  | 21  | -16 | -14 |
| <b>Retest : Inf. 2 HR: Sleep &gt; Wake for Some confidence &gt; Guess</b> |       |              |              |             |        |        |     |     |     |
| ParaHippocampal Gyrus                                                     | Right | 3            | <0.001       | 0.038       | 4.21   | 3.49   | 27  | -25 | -26 |
| Putamen                                                                   | Left  | 9            | <0.001       | 0.034       | 4.15   | 3.46   | -18 | -1  | 7   |
| Medial Temporal Pole                                                      | Right | 9            | <0.001       |             | 4.80   | 3.84   | 39  | 14  | -32 |
| Superior Parietal Lobule                                                  | Right | 24           | <0.001       |             | 4.42   | 3.62   | 39  | -49 | 61  |
| SupraMarginal Gyrus                                                       | Right | 13           | <0.001       |             | 4.30   | 3.55   | 48  | -43 | 28  |
| Superior Medial Gyrus                                                     | Left  | 3            | <0.001       |             | 3.71   | 3.18   | -12 | 32  | 34  |
| <b>Retest PPI : Sleep &gt; Wake for HR &gt; LR</b>                        |       |              |              |             |        |        |     |     |     |
| Caudate Nucleus                                                           | Right | 6            | <0.001       | 0.038       | 3.94   | 3.41   | 15  | 20  | 7   |
| Medial Prefrontal Cortex                                                  | Right | 1            | <0.001       | 0.047       | 3.34   | 2.99   | 15  | 59  | -5  |
| <b>Learning : HR&gt;LR modulated by HR-LR performance</b>                 |       |              |              |             |        |        |     |     |     |
| VTA                                                                       |       | 12           | <0.001       | 0.007       | 4.27   | 3.71   | -3  | -13 | -20 |
